# Supplementary material for: The antepartum stillbirth syndrome: risk factors and pregnancy conditions identified from the INTERGROWTH‐21st Project
Source: PubMed Central journal article supplement — BJOG. 2016 Dec 28;125(9):1145–53. doi: 10.1111/1471-0528.14463 (PMC6055673; doi:10.1111/1471-0528.14463), 2016-12-28
Supplement: BJO-125-1145-s002.pdf [file BJO-125-1145-s002.pdf]

**Table S1.** Descriptive characteristics of the mothers and babies.

| Characteristic                        | No. of participants (%) | Mean $\pm$ SD                   |
|---------------------------------------|-------------------------|---------------------------------|
| <b>Maternal characteristics</b>       | N= 59052                |                                 |
| Age, mean in yrs (sd)                 |                         | 29.2 (5.6)                      |
| Body-mass index (kg/m <sup>2</sup> ): |                         |                                 |
| < 18.5                                | 3352 (5.7)              |                                 |
| 18.5-25                               | 326102 (54.4)           |                                 |
| 25.01-30                              | 14452 (24.5)            |                                 |
| >30                                   | 7372 (12.5)             |                                 |
| Any prenatal smoking                  | 3197 (5.4)              |                                 |
| Alcohol > 5 units per week            | 243 (0.4)               |                                 |
| Recreational drugs in pregnancy       | 393 (0.7)               |                                 |
| Formal education (yrs)                |                         | 13.0 (3.8)                      |
| Single marital status                 | 2945 (5.0)              |                                 |
| Gestation at first ultrasound (days)  |                         | 95 (27-163) <sup>a</sup>        |
| Gestational age at delivery (wks)     |                         | 39.0 (37.0 - 41.0) <sup>a</sup> |
| <b>Pregnancy characteristics</b>      |                         |                                 |
| Hypertension %                        |                         |                                 |
| Essential                             | 1092 (1.8)              |                                 |
| Pregnancy induced hypertension        | 4147 (7.0)              |                                 |
| Pre-eclampsia                         | 1385 (2.3)              |                                 |
| Severe pre-eclampsia                  | 480 (0.8)               |                                 |
| Gestational diabetes                  | 3417 (5.8)              |                                 |

Caesarean delivery 23474 (39.8)

**Fetal/Neonatal characteristics** N= 60121

Birth weight (kg) 3.1 (0.6)

Birth length (cm) 48.7 (2.6)

Male fetal sex 30984 (51.6)

Preterm birth < 37 weeks 7094 (12.5)

Stillbirths (per 1000 births) 553 (9.2)

    Antepartum death 445 (7.4)

    Intrapartum death 108 (1.8)

---

a. Median (interquartile range)

**Table S2.** Details of congenital abnormalities detected in antepartum death

| Case number | Clinical information to describe abnormality from fetal ultrasound                                                                                                                                                                                                                                                                                                                                                               | Final Diagnosis                                   |
|-------------|----------------------------------------------------------------------------------------------------------------------------------------------------------------------------------------------------------------------------------------------------------------------------------------------------------------------------------------------------------------------------------------------------------------------------------|---------------------------------------------------|
| 1           | Antenatal scan 29 weeks + 1day: single AV valve opening into a large presumed right ventricle. The valve is dysplastic and moderately regurgitant. Flow is purely left to right across an unrestrictive foramen ovale. A left AV valve, the left LV cavity and ascending aorta are hard to identify but transverse aorta has retrograde fill.                                                                                    | Hypoplastic left heart syndrome                   |
| 2           | Hydrocephalus, micrognathia, cleft palate palpable, low set ears, ?chondrodysplasia, ?prune belly abdomen, over riding 2nd and 3rd digits, sac on spine, short sternum                                                                                                                                                                                                                                                           | Trisomy 18                                        |
| 3           | Hydrocephalus Meningomyelocele                                                                                                                                                                                                                                                                                                                                                                                                   | Hydrocephalus, Meningomyelocele                   |
| 4           | TOF, bilateral clubbed feet, 22q11 deletion                                                                                                                                                                                                                                                                                                                                                                                      | TOF                                               |
| 5           | Anencephaly with no other abnormalities notes                                                                                                                                                                                                                                                                                                                                                                                    | Anencephaly                                       |
| 6           | Single intrauterine gestation with biometry that is internally symmetrical and concordant with gestational age of 22 weeks 0 days. Fetal anatomy is normal with exception of the fetal thorax. There is a large homogenous hyperechoic mass filling the entire right fetal thorax, which measures 4.21 x 3.7 x 2.14cm with a total volume of 17.4mL. The pulmonary artery is enlarged and feeds directly into the centre of this | Lung mass, likely CPAM.                           |
| 7           | Cardiomegaly - Thymic Hypoplasia Splenomegaly - Renal malformation (horse shoe kidney)                                                                                                                                                                                                                                                                                                                                           | Genetic Syndrome = Noonan (probable)              |
| 8           | Vertebral Dysplasia - liver and spleen hypoplasia Hypoplastic left heart syndrome = aorta hypoplasia + ventricular septal defect                                                                                                                                                                                                                                                                                                 | Poly-malformations of the heart, liver, vertebrae |
| 9           | Single umbilical artery                                                                                                                                                                                                                                                                                                                                                                                                          | Single umbilical artery                           |
| 10          | Neural Tube Defect Bilateral ventriculomegealy chiari malformation                                                                                                                                                                                                                                                                                                                                                               | Spina Bifida Hydrocephalus                        |
| 11          | Heart exists more horizontal than normal and left side especially LVOT smaller than expected                                                                                                                                                                                                                                                                                                                                     | small left ventricle, possible aortic coarctation |
| 12          | Brain left ventricle dilation. Ambiguous genitalia. Nuchal thickening. Questionable cervical thoracic kyphosis                                                                                                                                                                                                                                                                                                                   | Thickened nuchal translucency, mild               |
| 13          | Complex cardiac anomalies. Post axial polydactyly of lower extremities                                                                                                                                                                                                                                                                                                                                                           | Complex cardiac anomalies, Post axial polydactyly |
| 14          | Suspected bowel atresia                                                                                                                                                                                                                                                                                                                                                                                                          | Fetal jejunal obstruction                         |

**Table S3.** Maternal characteristics comparing antepartum stillborn with live born babies

| Condition                                | Antepartum<br>deaths | Live births<br>N (%) | N | HR (95% CI) <sup>a</sup> |
|------------------------------------------|----------------------|----------------------|---|--------------------------|
| Low socio-economic standing <sup>b</sup> | N=418                | N=56 783             |   |                          |
| No                                       | 291 (69.6)           | 46075 (81.1)         |   | 1.00 (ref)               |
| Yes                                      | 127 (30.4)           | 10708 (18.9)         |   | 1.72 (1.29-2.30)         |
| Marital status                           | 439                  | 59367                |   |                          |
| Married/cohabiting                       | 390 (88.8)           | 56427 (95.0)         |   | 1.00 (ref)               |
| Single/Widowed/Divorced                  | 49 (11.2)            | 2940 (5.0)           |   | 2.08 (1.51-2.88)         |
| Maternal years of formal education       | 324                  | 46560                |   |                          |
| <6                                       | 30 (9.3)             | 2901 (6.2)           |   | 1.94 (1.22-3.10)         |
| 6-12                                     | 125 (38.6)           | 17362 (37.3)         |   | 1.57 (1.20-2.04)         |
| >12                                      | 169 (52.2)           | 26297 (56.5)         |   | 1.00 (ref)               |
| Maternal age (years)                     | 440                  | 59562                |   |                          |
| <18                                      | 9 (2.0)              | 1237 (2.1)           |   | 0.99 (0.49-1.98)         |
| 18-25                                    | 120 (27.3)           | 18615 (31.3)         |   | 1.0 (ref)                |
| 26-34                                    | 234 (53.2)           | 30864 (51.8)         |   | 1.09 (0.86-1.38)         |
| 35-39                                    | 55 (12.5)            | 7393 (12.4)          |   | 1.01 (0.71-1.43)         |
| ≥40                                      | 22 (5.0)             | 1453 (2.4)           |   | 2.17 (1.36-3.47)         |
| Maternal height (cm)                     | 392                  | 46770                |   |                          |
| ≥155                                     | 315 (80.4)           | 46770 (79.0)         |   | 1.0 (ref)                |
| <155                                     | 77 (19.6)            | 123430 (21.0)        |   | 1.15 (0.88-1.50)         |
| Maternal BMI (kg/m <sup>2</sup> )        | 441                  | 59533                |   |                          |
| <18.5                                    | 12 (3.3)             | 3375 (5.8)           |   | 0.74 (0.41-1.34)         |
| 18.5- 25                                 | 199 (54.8)           | 32428 (56.1)         |   | 1.0 (ref)                |
| 25.1-30                                  | 97 (26.7)            | 14574 (25.2)         |   | 0.97 (0.75-1.26)         |
| 30.1-34                                  | 34 (9.4)             | 4461 (7.7)           |   | 1.20 (0.83-1.75)         |
| ≥35                                      | 21 (5.8)             | 2994 (5.2)           |   | 1.18 (0.74-1.86)         |
| Smoking/tobacco                          | 441                  | 59533                |   |                          |

|                           |            |              |                  |
|---------------------------|------------|--------------|------------------|
| No                        | 409 (92.7) | 56314 (94.6) | 1.0 (ref)        |
| Yes                       | 32 (7.3)   | 3219 (5.4)   | 1.32 (0.90-1.95) |
| Illicit drug use          | 442        | 59534        |                  |
| No                        | 436 (98.6) | 59142 (99.3) | 1.0 (ref)        |
| Yes                       | 6 (1.4)    | 392 (0.7)    | 1.55 (0.68-3.52) |
| Alcohol >5 units per week | 442        | 59534        |                  |
| No                        | 436 (98.6) | 59297 (99.6) | 1.0 (ref)        |
| Yes                       | 6 (1.4)    | 237 (0.4)    | 2.84 (1.26-6.38) |
| High risk occupation      | 435        | 59336        |                  |
| No                        | 428 (98.4) | 58893 (99.3) | 1.0 (ref)        |
| Yes                       | 7 (1.6)    | 443 (0.7)    | 1.69 (0.79-3.60) |

---

<sup>a</sup> Adjusted for country of birth

<sup>b</sup> Determined using predefined country specific criteria

<sup>c</sup> Mean (SD)

**Table S4.** Associations between Maternal past medical and obstetric history and antepartum stillbirth

| <b>Condition</b>                             | <b>Antepartum deaths<br/>N (%)</b> | <b>Live births<br/>N (%)</b> | <b>HR<sup>a</sup> (95 % CI)</b> |
|----------------------------------------------|------------------------------------|------------------------------|---------------------------------|
| Diabetes                                     | N= 443                             | N=59547                      |                                 |
| No                                           | 435 (98.2)                         | 58 998(99.1)                 | 1.0 (ref)                       |
| Yes                                          | 8 (1.8)                            | 549 (0.9)                    | 1.99 (0.98-4.03)                |
| Hypertension                                 | 443                                | 59547                        |                                 |
| No                                           | 409 (92.3)                         | 58465 (98.2)                 | 1.0 (ref)                       |
| Yes                                          | 34 (7.7)                           | 1082 (1.8)                   | 4.19 (2.91-6.05)                |
| Cardiac disease                              | 443                                | 59545                        |                                 |
| No                                           | 438 (98.9)                         | 59017 (99.1)                 | 1.0 (ref)                       |
| Yes                                          | 5 (1.1)                            | 528 (0.9)                    | 1.24 (0.51-3.01)                |
| Thyroid disease                              | 443                                | 59545                        |                                 |
| No                                           | 431 (97.3)                         | 57 657(96.8)                 | 1.0                             |
| Yes                                          | 12 (2.7)                           | 18 788 (3.2)                 | 0.76 (0.42-1.35)                |
| HIV/AIDS                                     | 443                                | 59547                        |                                 |
| No                                           | 436 (98.4)                         | 59379 (99.7)                 | 1.0 (ref)                       |
| Yes                                          | 7 (1.6)                            | 168 (0.3)                    | 4.84 (2.28-10.31)               |
| Fertility treatment                          | 441                                | 59466                        |                                 |
| No                                           | 433 (98.2)                         | 57470 (96.6)                 | 1.0 (ref)                       |
| Yes                                          | 8 (1.8)                            | 1996 (3.4)                   | 0.54 (0.27-1.10)                |
| Primigravida                                 | 445                                | 59567                        |                                 |
| Yes                                          | 159 (35.7)                         | 23515 (39.5)                 | 1.0 (ref)                       |
| No                                           | 286 (64.3)                         | 36052 (60.5)                 | 1.21 (0.99-1.48)                |
| Last two pregnancies miscarried <sup>b</sup> | 285                                | 36115                        |                                 |
| No                                           | 258 (90.5)                         | 34072 (94.3)                 | 1.0 (ref)                       |
| Yes                                          | 27 (9.5)                           | 2043 (5.7)                   | 1.55 (1.02-2.35)                |

|                                       |            |              |                  |
|---------------------------------------|------------|--------------|------------------|
| Previous preterm birth <sup>b</sup>   | 225        | 28421        |                  |
| No                                    | 192 (85.3) | 26129 (91.9) | 1.0 (ref)        |
| Yes                                   | 33 (14.7)  | 2292 (8.1)   | 2.05 (1.53-3.21) |
| Previous perinatal death <sup>b</sup> | 225        | 28433        |                  |
| No                                    | 206 (91.6) | 27180 (95.6) | 1.0 (ref)        |
| Yes                                   | 19 (8.4)   | 1253 (4.4)   | 1.98 (1.22-3.23) |

---

<sup>a</sup> Adjusted for country of birth

<sup>b</sup> Excluding women in their first pregnancy

**Table S5.** Conditions first detected in pregnancy and pregnancy-specific conditions and antepartum stillbirth

| Condition                           | Antepartum stillbirth N (%) | Live births N (%) | HR <sup>a</sup> (95% CI) |
|-------------------------------------|-----------------------------|-------------------|--------------------------|
| HIV/AIDS in pregnancy               | N= 433                      | N=59541           |                          |
| No                                  | 426 (98.4)                  | 59342(99.7)       | 1.0 (ref)                |
| Yes                                 | 7 (1.6)                     | 199 (0.3)         | 4.22 (1.97-9.02)         |
| Lower urinary tract infection       | 433                         | 59538             |                          |
| No                                  | 369 (85.2)                  | 52419 (88.0)      | 1.0 (ref)                |
| Yes                                 | 64 (14.8)                   | 7119 (12.0)       | 1.09 (0.81-1.46)         |
| Other infection                     | 433                         | 59538             |                          |
| No                                  | 401 (92.6)                  | 56714 (95.3)      | 1.0 (ref)                |
| Yes                                 | 32 (7.4)                    | 2824 (4.7)        | 1.32 (0.90-1.95)         |
| Malaria <sup>b</sup>                | 433                         | 59538             |                          |
| No                                  | 429 (99.1)                  | 59447 (99.8)      | 1.0 (ref)                |
| Yes                                 | 4 (0.9)                     | 91 (0.2)          | 6.06 (2.27-16.23)        |
| Positive syphilis test <sup>b</sup> | 433                         | 59536             |                          |
| No                                  | 431 (99.5)                  | 59481 (99.9)      | 1.0 (ref)                |
| Yes                                 | 2 (0.5)                     | 55 (0.1)          | 5.20 (1.30-20.86)        |
| Mental illness                      | 434                         | 59538             |                          |
| No                                  | 418 (96.3)                  | 58562(98.4)       | 1.0 (ref)                |
| Yes                                 | 16 (3.7)                    | 976 (1.6)         | 1.61 (0.94-2.73)         |
| Gestational diabetes                | 423                         | 59539             |                          |
| No                                  | 416 (96.3)                  | 56071 (94.2)      | 1.0 (ref)                |
| Yes                                 | 16 (3.7)                    | 3468 (5.8)        | 0.72 (0.43-1.19)         |
| Antepartum haemorrhage              | 432                         | 59533             |                          |
| No                                  | 373(86.3)                   | 56936 (95.6)      | 1.0 (ref)                |
| Yes                                 | 59 (13.2)                   | 2597 (4.4)        | 3.68 (2.75-4.92)         |
| Pregnancy induced hypertension      | 433                         | 59540             |                          |



|                                           |            |               |                  |
|-------------------------------------------|------------|---------------|------------------|
| No                                        | 383 (88.5) | 55314 (92.9)  | 1.0 (ref)        |
| Yes                                       | 50 (11.5)  | 4226 (7.1)    | 1.75 (1.29-2.37) |
| Pre-eclampsia                             | 432        | 59537         |                  |
| No                                        | 405 (93.8) | 58105 (97.6)  | 1.0 (ref)        |
| Yes                                       | 27 (6.2)   | 1432 (2.4)    | 3.23 (2.18-4.78) |
| Severe pre-eclampsia/ eclampsia/<br>HELLP | 432        | 59539         |                  |
| No                                        | 415 (96.1) | 59050 (99.2)  | 1.0 (ref)        |
| Yes                                       | 17 (3.9)   | 489 (0.8)     | 5.53 (3.38-9.06) |
| Multiple pregnancy                        | 445        | 59567         |                  |
| No                                        | 413 (92.8) | 57508 (96.6)  | 1.0 (ref)        |
| Yes                                       | 32 (7.2)   | 2059(3.4)     | 2.67 (1.85-3.86) |
| Gestational age at delivery<br>(weeks)    |            |               |                  |
| 16-23.9                                   | 98 (22.0)  | 36 (0.1)      |                  |
| 24-27.9                                   | 89 (20.0)  | 226 (0.4)     |                  |
| 28-32.9                                   | 90 (20.2)  | 862 (1.4)     |                  |
| >33                                       | 168 (37.8) | 58443 (98.1)  |                  |
| Fetal sex                                 | N= 421     | N= 59 561     |                  |
| Male                                      | 235 (55.8) | 30694 (51.5)  | 1.21 (1.0-1.46)  |
| Female                                    | 186 (44.2) | 28867 (48.5)  | 1.00 (ref)       |
| Congenital anomaly                        | 445        | 59 561        |                  |
| No                                        | 431 (96.9) | 58 256 (97.8) | 1.0 (ref)        |
| Yes                                       | 14 (3.1)   | 1305 (2.2)    | 1.46 (0.86-2.50) |
| Fetal distress in pregnancy               | 432        | 59539         |                  |
| No                                        | 414 (95.8) | 58515 (98.3)  | 1.0 (ref)        |
| Yes                                       | 18 (4.2)   | 1024 (1.7)    | 2.91 (1.80-4.69) |

<sup>a</sup> Adjusted for country of birth

<sup>b</sup> Included as malaria and syphilis are important global causes of antepartum stillbirth, however less than 5 cases of stillbirth recorded across all sites in this study
